# Supplementary material for: Chemogenomic Profiling of a Plasmodium falciparum Transposon Mutant Library Reveals Shared Effects of Dihydroartemisinin and Bortezomib on Lipid Metabolism and Exported Proteins
Source: PubMed Central journal article supplement (PMC10269874; doi:10.1128/spectrum.05014-22), 2023-04-17
Supplement: spectrum.05014-22-s0001.pdf [file spectrum.05014-22-s0001.pdf]

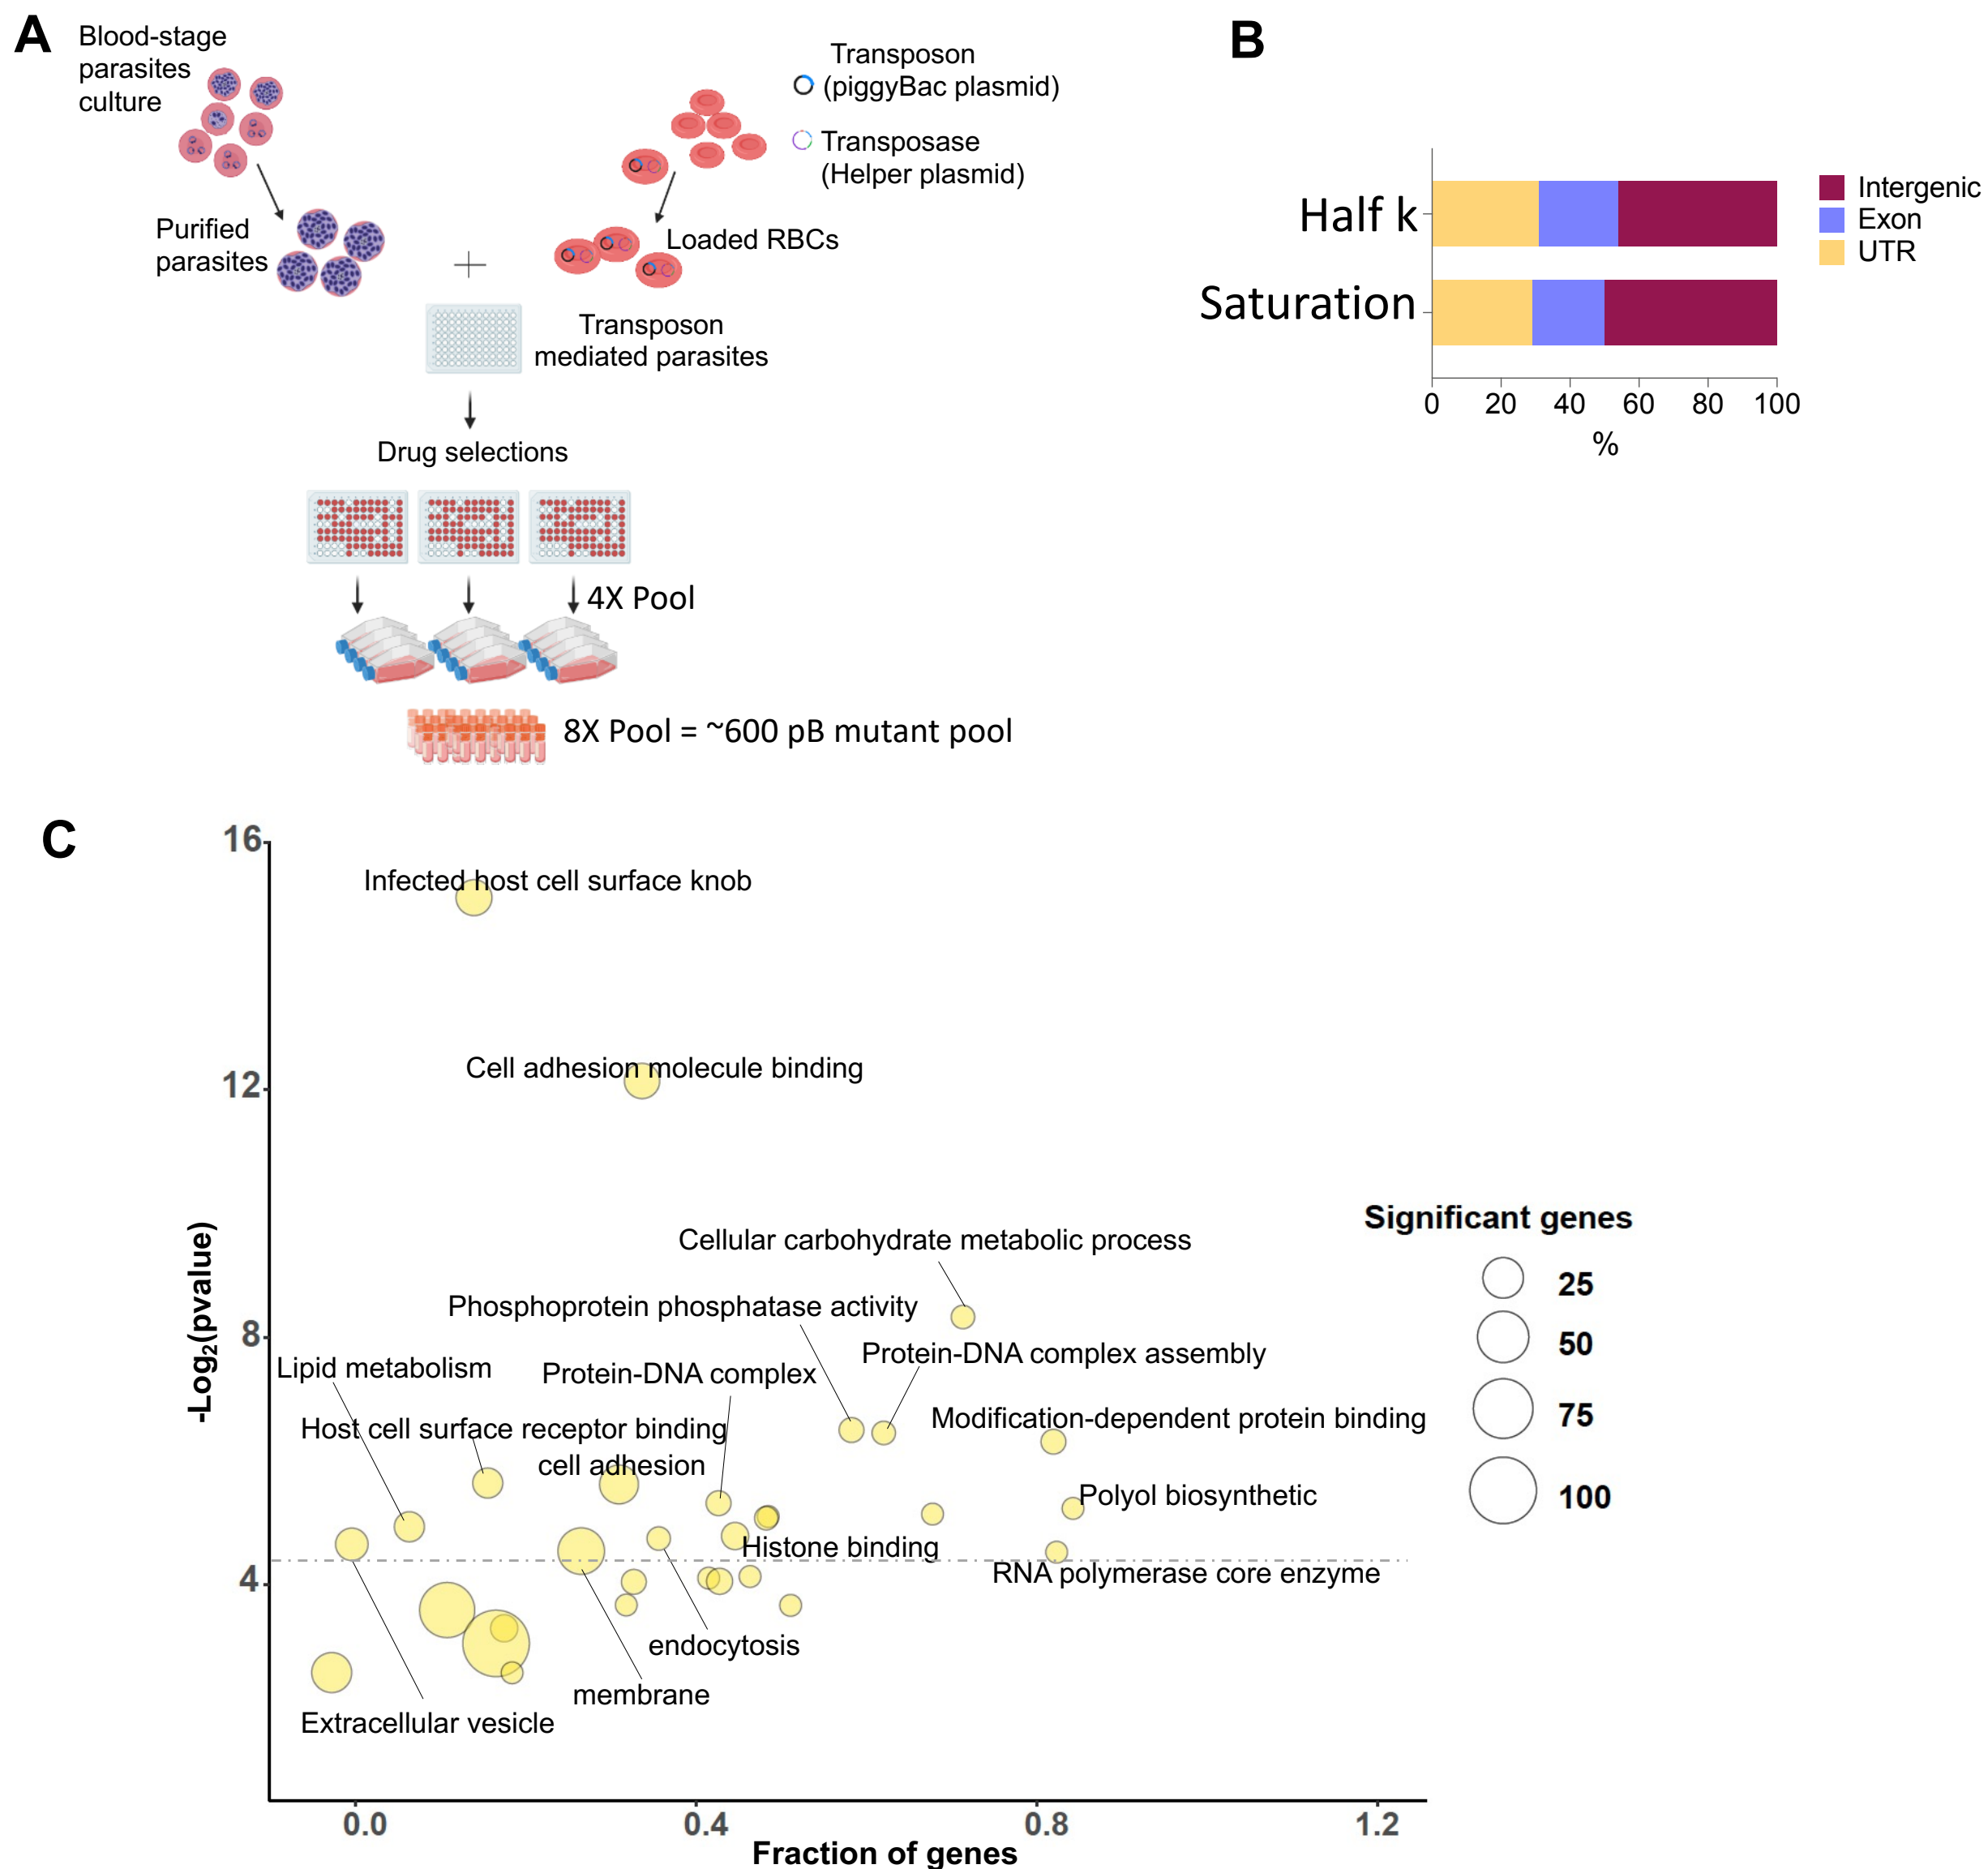

**Figure S1.** A) Experiment approach for random genome saturation mutagenesis optimized to generate mutants with a single *piggyBac* insertion (Zhang *et al* 2018). B) Proportion of each type of *piggyBac* insertion in the half k *pB* library and saturation library from Zhang *et al* 2018. C). Gene Ontology (GO) enrichment functional analysis of significant cellular components, molecular function, and biological processes, for the half K *pB* library, along with their corresponding pvalues (above dotted line  $pvalue < 0.05$ ). The GO enrichment was performed testing GO-terms mapped to genes in the category of interest (all genes disrupt in the half k *pB* library, and all genes disrupt in the saturation library, Zhang *et al* 2018) against a background of GO-terms mapped to all other genes in the analysis (see Method and Table S1).

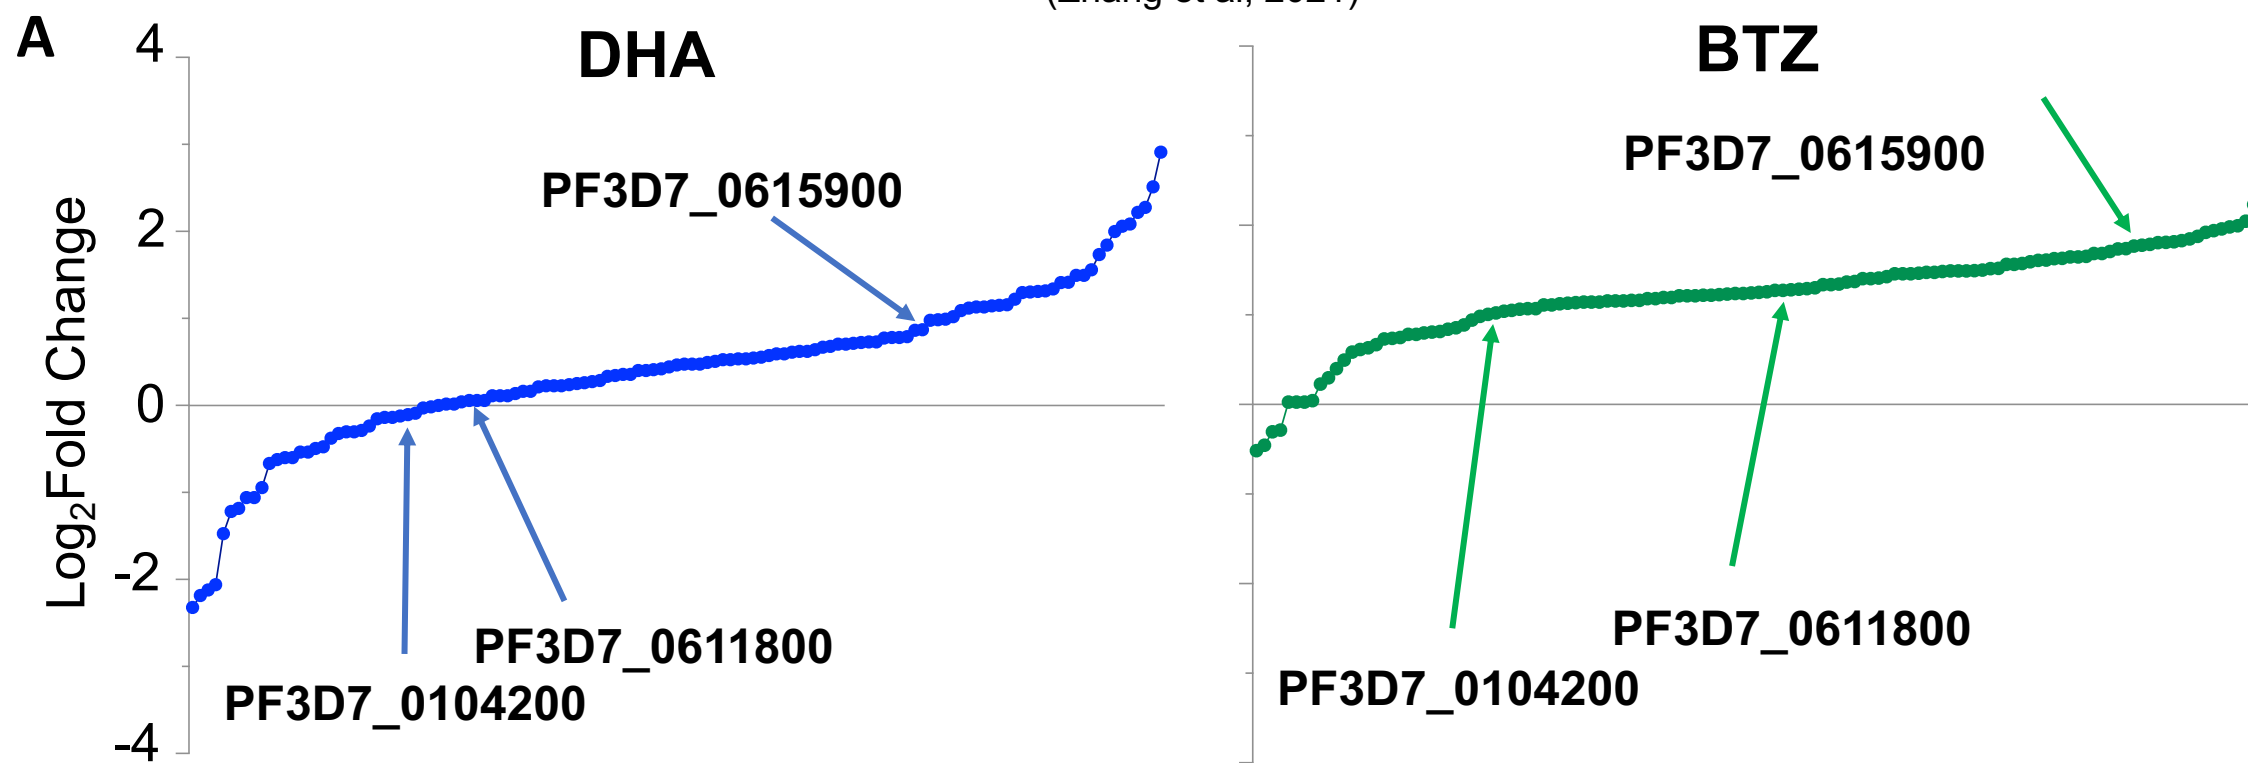

**B** *PiggyBac* Individual-Growth

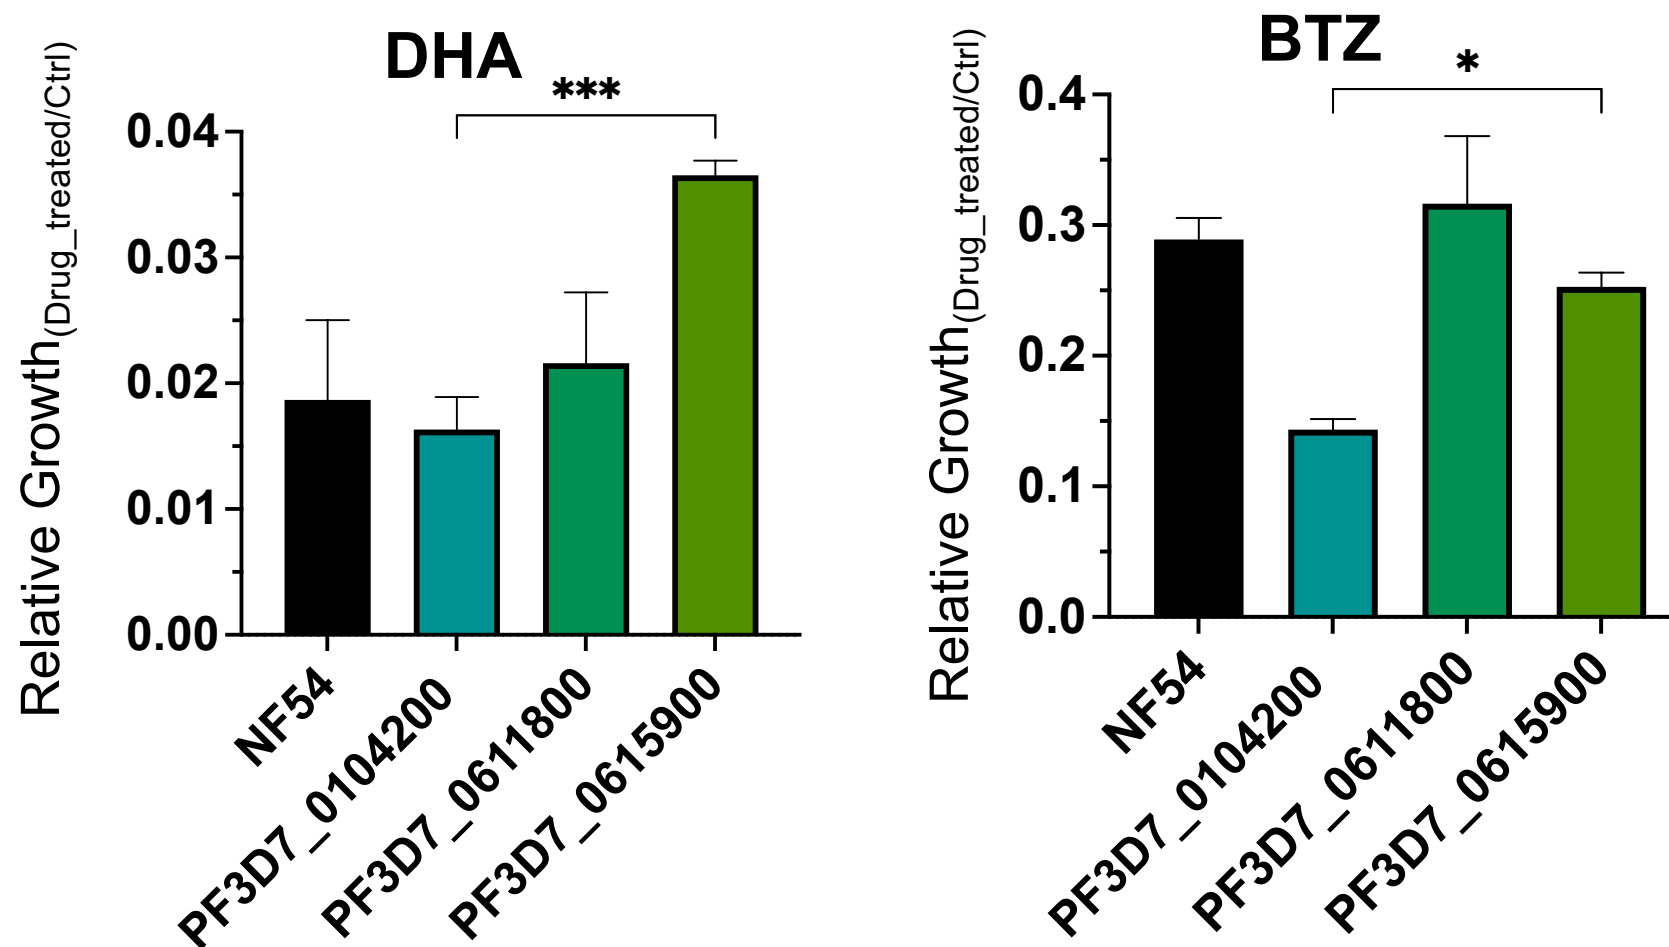

**C**

| GeneID        | Function Description                           | MIS  | PB mutant ID | insertion site       | Insertion location |
|---------------|------------------------------------------------|------|--------------|----------------------|--------------------|
| PF3D7_0104200 | StAR-related lipid transfer protein            | 0.28 | pB104*       | PfNF54_01_m1::186648 | 5-UTR              |
|               |                                                |      |              | PfNF54_01_m1::186620 | 5-UTR              |
| PF3D7_0611800 | conserved Plasmodium protein, unknown function | 1    | pB15*        | PfNF54_06_m1::498591 | Exon               |
|               |                                                |      |              | PfNF54_06_m1::507016 | Exon               |
| PF3D7_0615900 | protein phosphatase, putative                  | 1    | pB3*         | PfNF54_06_m1::667365 | Exon               |
|               |                                                |      |              | PfNF54_06_m1::664011 | Exon               |

**Figure S2.** DHA and BTZ Phenotype of pooled and individual *piggyBac* mutant growth. A) Pilot *pB*-library (performed in Zhang *et al* 2021). The **Log2Foldchange** drug/control were ranked from sensitive values (**Log2Foldchange** <0) to tolerant phenotypes (**Log2foldchange**>0). B). Individual growth for DHA and BTZ, upon sublethal dose of drug pressure (see Method). Pool library screens (Pilot and half K) and individual growth were performed for 3-cycles-growth (144 hours) continue drug pressured. Statistical significance was determined by One way ANOVA tests follows by Dunnet's T3 multiple comparison test (\*p < 0.05; \*\*\*two-tailed Wilcoxon p < 0.001); error bars represent the standard deviation. C). Three *pB* mutated genes, their characteristics and descriptions and their *piggyBac* insertion site.

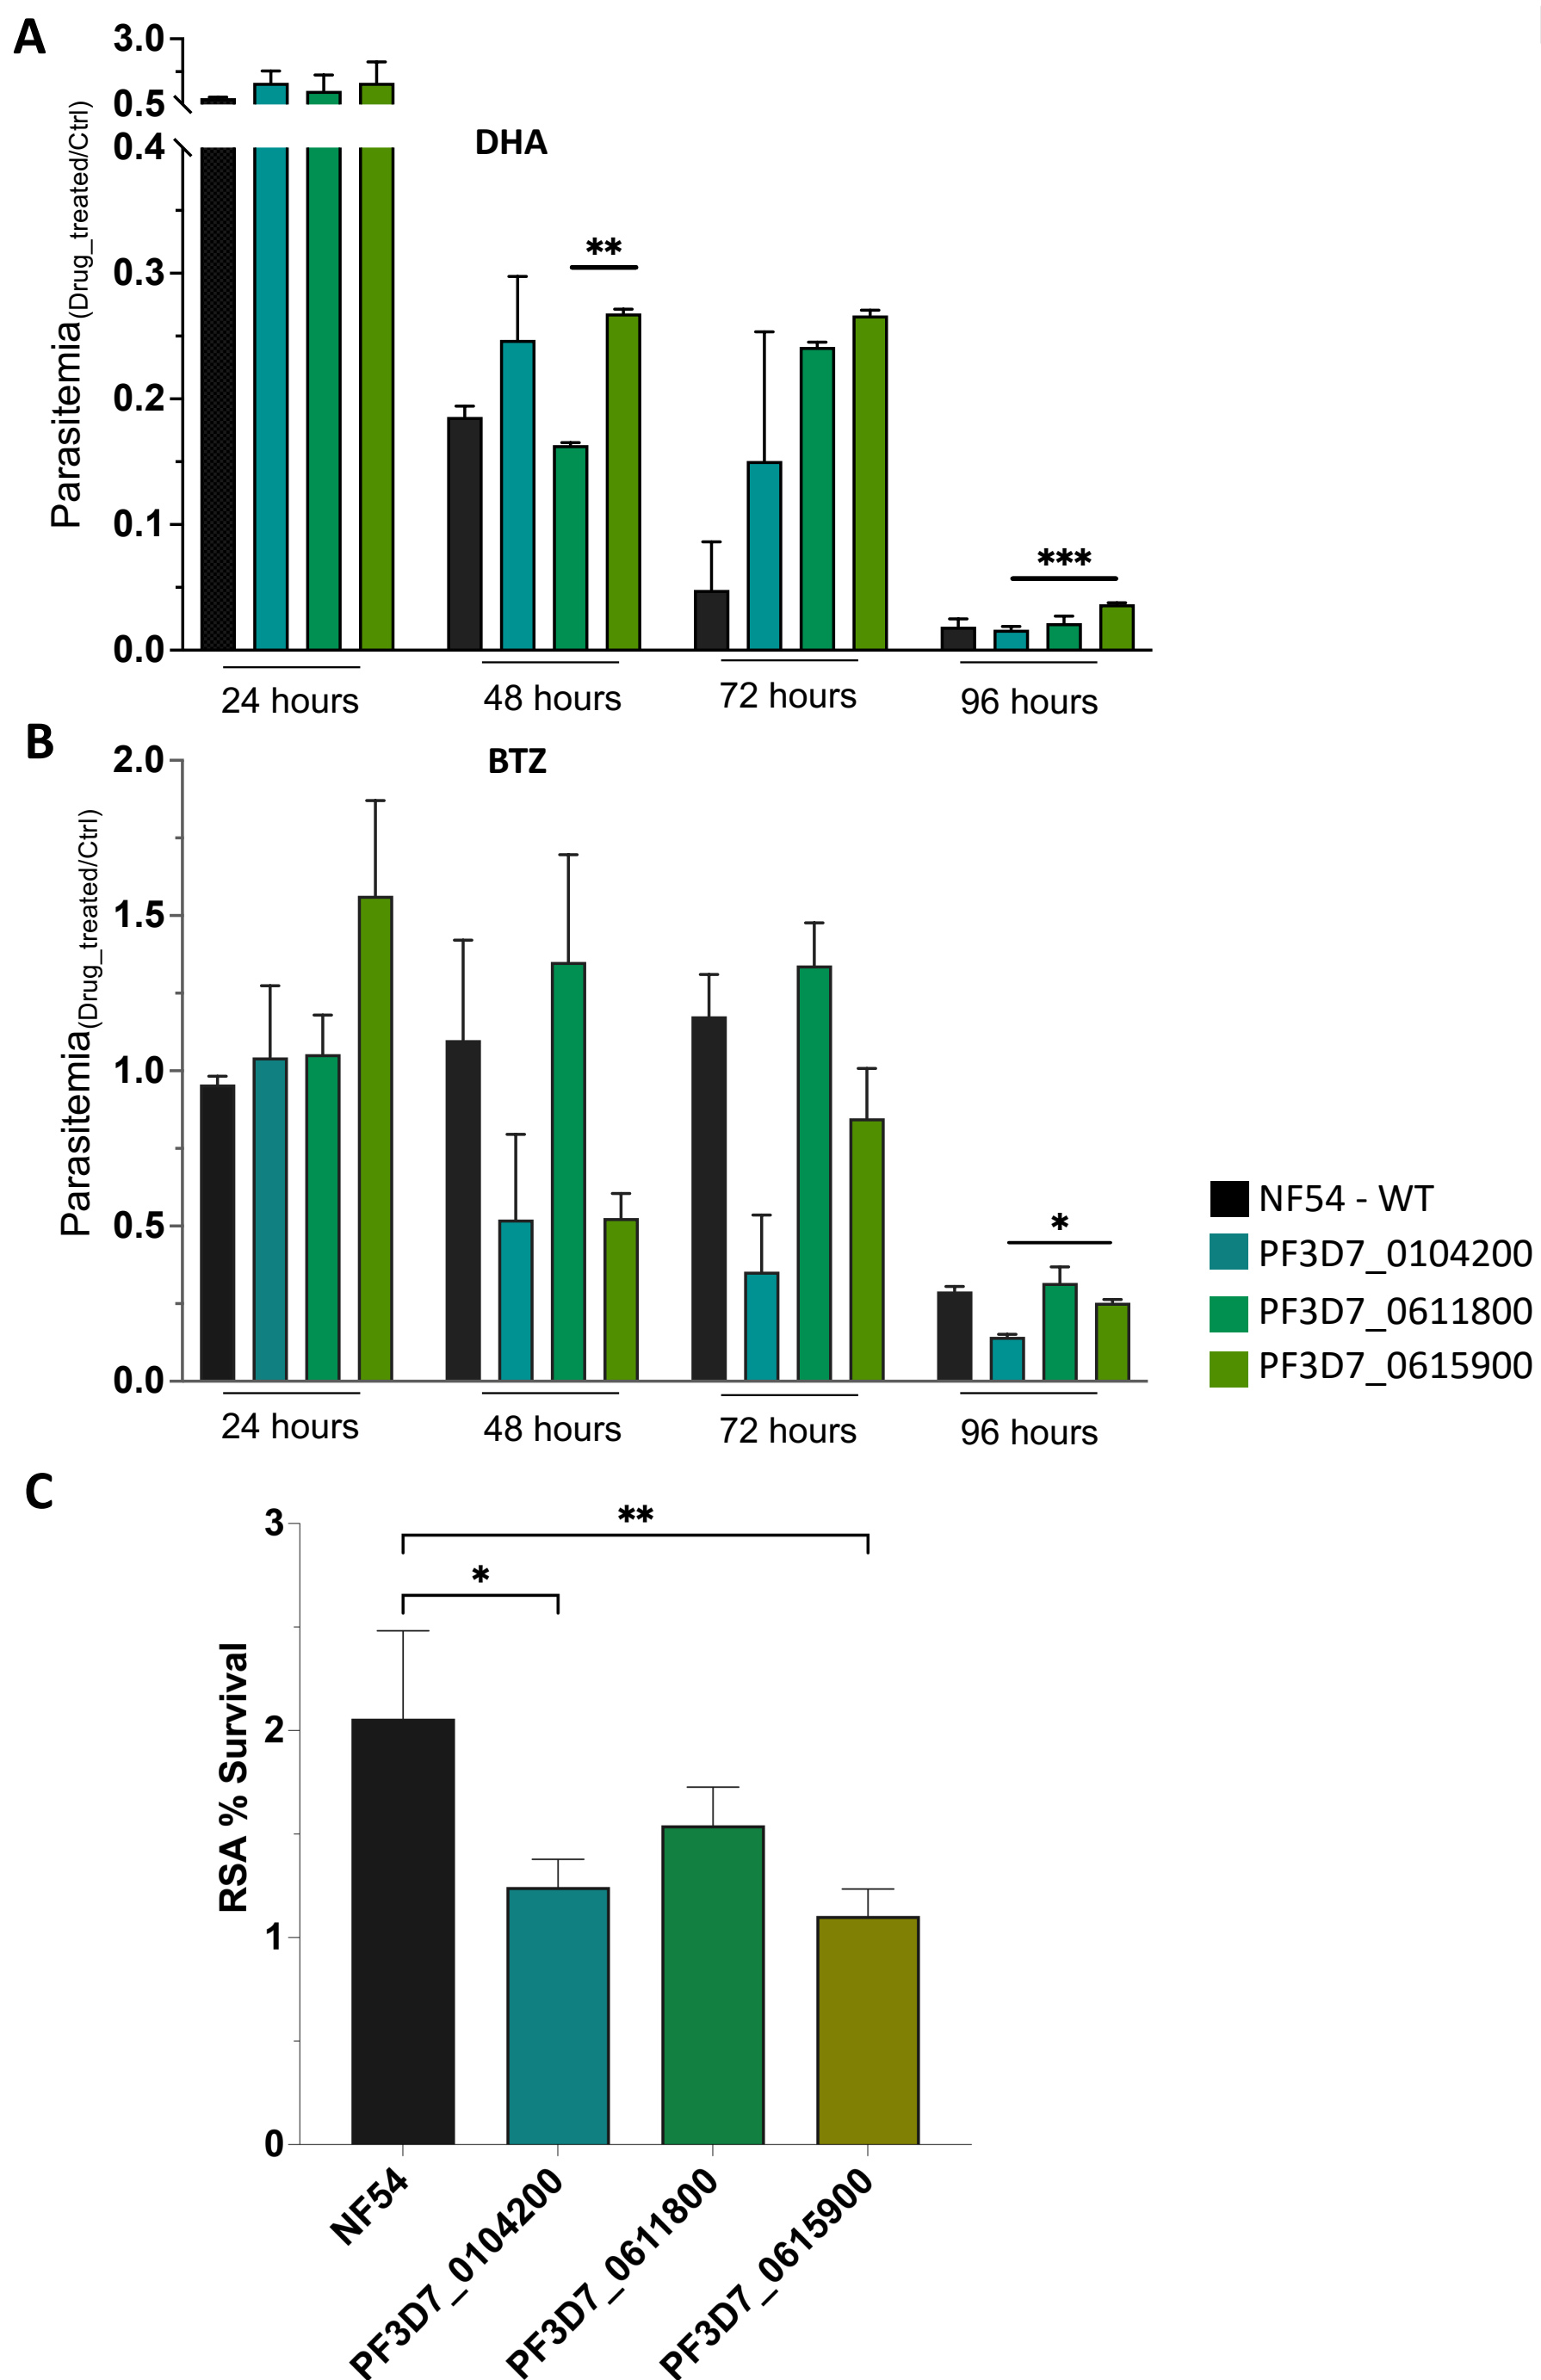

**Figure S3.** Time course of proportion of parasites (parasitemia of drug\_treated divided by no drug control) pressured with sublethal dose with **A)** DHA and **B)** BTZ (see Method). **C).** Ring Survival Assay (RSA). Statistical significance was determined by One way ANOVA tests followed by Dunnett's T3 multiple comparison. (\* $p < 0.05$ ; \*\*  $p$ value  $< 0.01$  \*\*\*  $p < 0.001$ ); error bars represent the standard deviation.

### A. Schematic map of *piggyBac* insertions neighbor genes region on chromosome 01

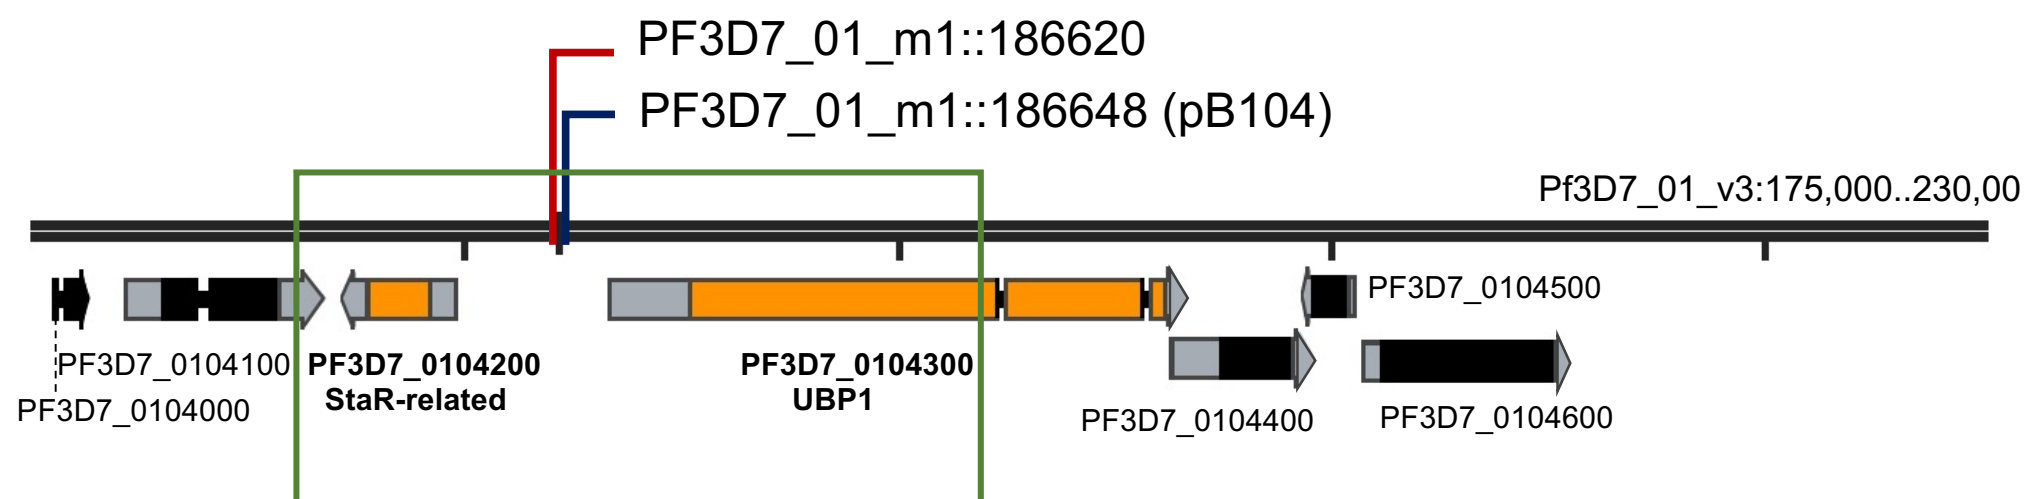

### B.

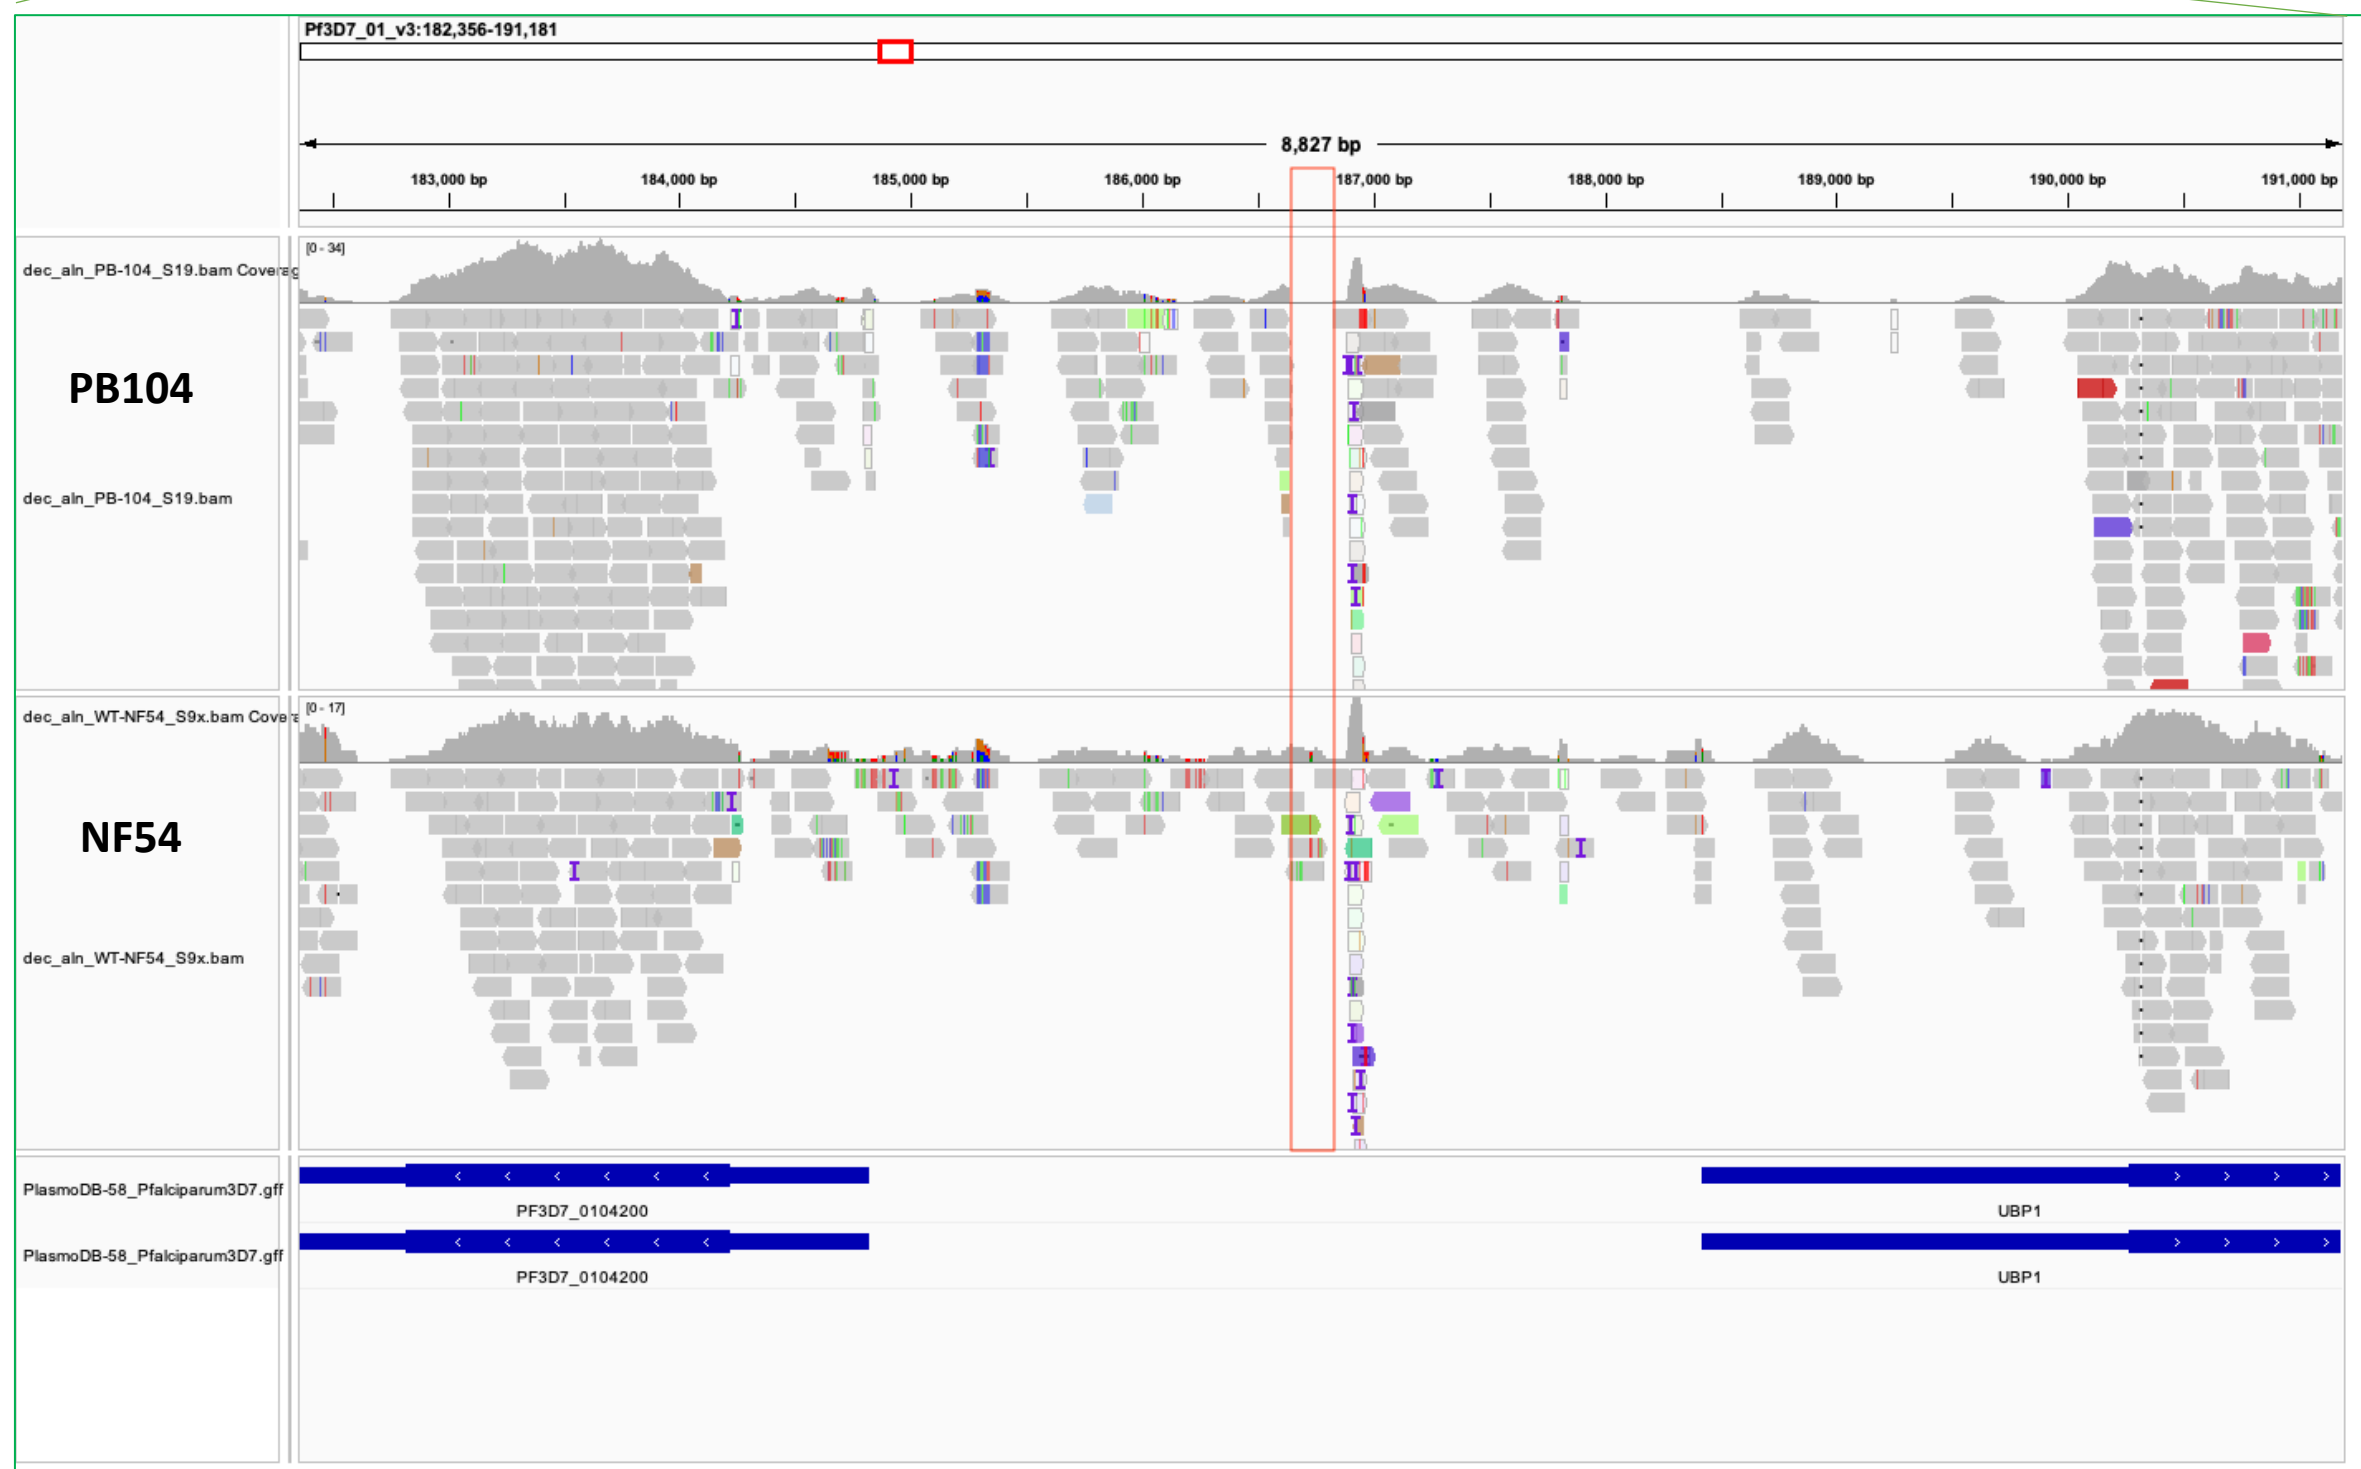

A) Schematic segment of chromosome 01 of *Plasmodium falciparum* 3D7 show two *piggyBac* insertions PF3D7\_01\_m1::186620 (Half K *pB*-library) and PF3D7\_01\_m1::186648 (*pB104* – Pilot-library) placed in a regulatory region on 5'-end of two essential genes StaR-related lipid transport (PF3D7\_0104200) and PF3D7\_0104300 UBP1 (ubiquitin carboxyl-terminal hydrolase 1). Green box shows the region highlights in B). B). Integrative Genomics Viewer (IGV) screenshot showing the alignment of whole genome sequence reads mapping in 3D7 *P. falciparum* genome (see method) of *pB104* and NF54 at the Chromosome 1 region between 182,356 to 191,181, highlighting the absence of reads at *piggyBac* insertion site in *pB104* genome and presence of reads in NF54 genome (red box).

A. RNAseq Differential expression of *pB*-insertion (*pB104*) neighbor genes no-Drug Growth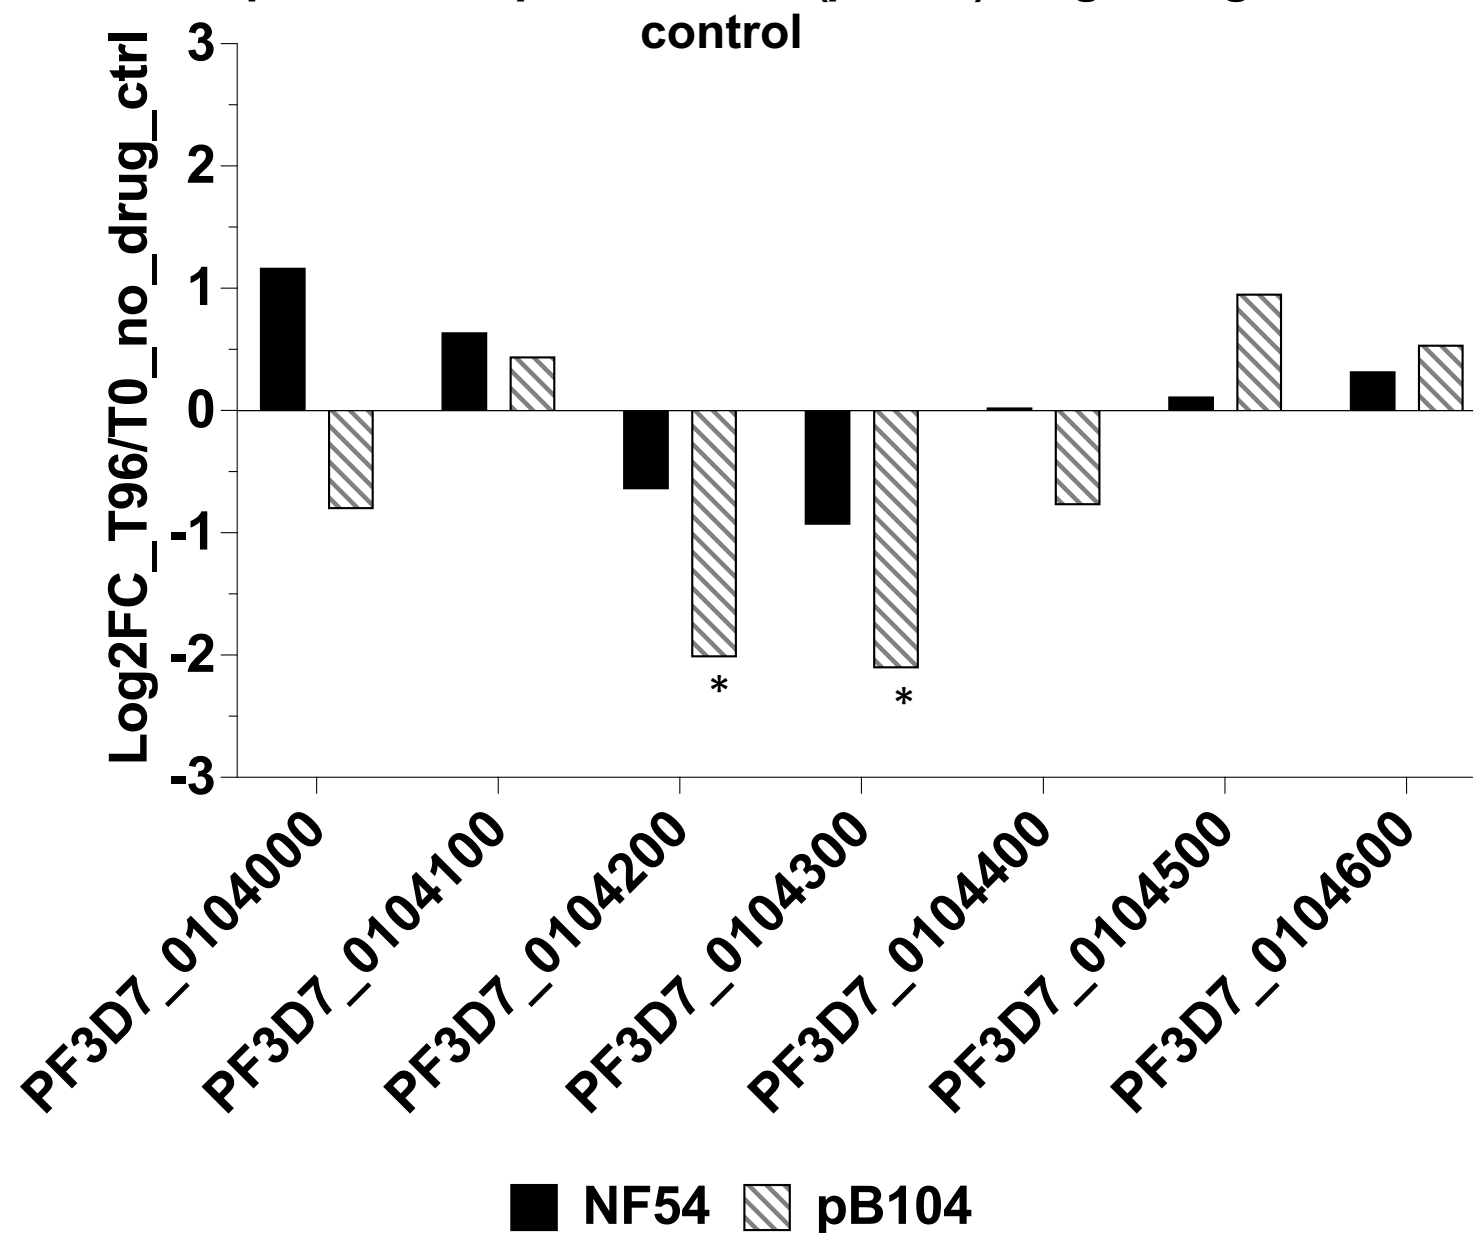

## B. Star-related (PF3D7\_0104200)

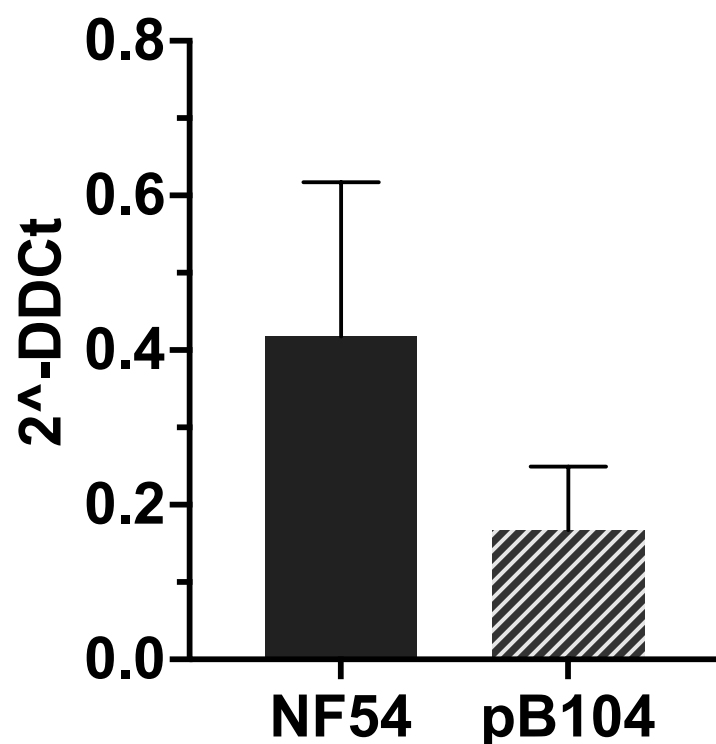

## C. UBP1 (PF3D7\_0104300)

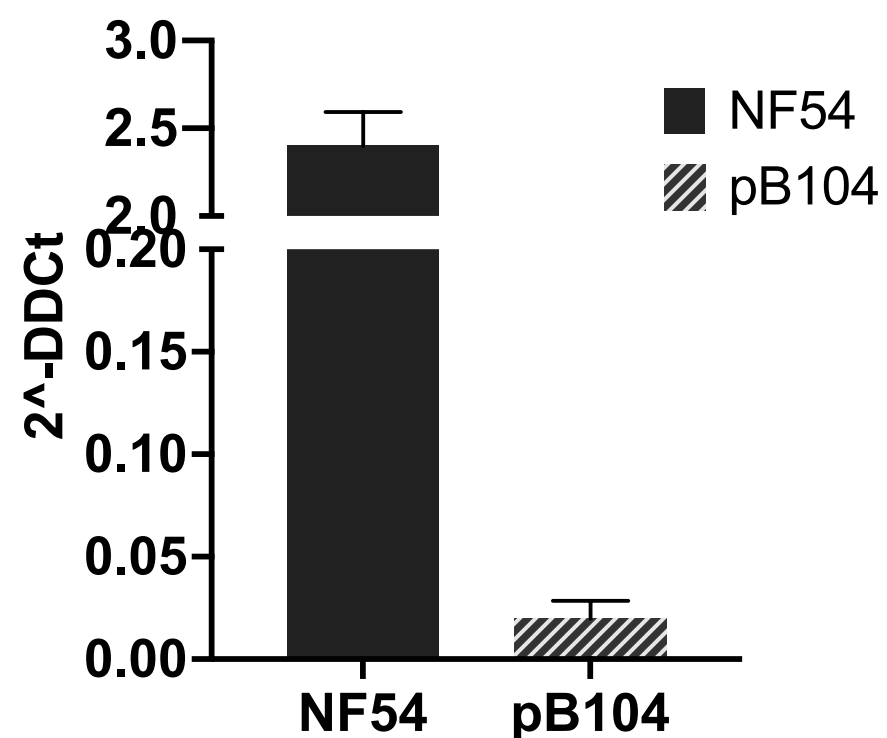

**Figure S5.** A) Differential expression of *piggyBac* in pB104 insertion neighbor genes obtained by RNAseq data analysis. Deseq2 was used to normalize and calculated the foldchange between T96 and T0 of no-drugs growth-controls. StaR-related lipid transport (PF3D7\_0104200) and ubiquitin carboxyl-terminal hydrolase 1 (UBP1, PF3D7\_0104300) are significant downregulated (\* $\text{Log}_2\text{foldchange} < -2$  and  $\text{padj} < 0.01$ ) in *pB104*, but not in NF54. The entire data are provided at Data set S4 and S5. B) StaR-related lipid transport (PF3D7\_0104200) and C) UBP1 (PF3D7\_0104300) gene expression (RT-qPCR) in NF54 and pB104.  $2^{-\Delta\Delta\text{Ct}}$  is taken as the fold-change of the relative to time point 0, (T0) gene expression; error bars represent the standard deviation (see Method).



DHA

BTZ

| Gene-ID       | Symbol  | Description                                       |
|---------------|---------|---------------------------------------------------|
| PF3D7_1148500 | NA      | non-coding RNA                                    |
| PF3D7_1203800 | NA      | non-coding RNA                                    |
| PF3D7_0919600 | WBP1    | WBP1 DDP glycosyltransferase                      |
| PF3D7_1310000 | OSCP    | ATP synthase subunit O, mitochondrial, putative   |
| PF3D7_1478900 | NA      | non-coding RNA                                    |
| PF3D7_0931200 | Sel2    | selenoprotein                                     |
| PF3D7_1209800 | ATP11   | ATP synthase mitoc. F1 complex assembly factor 1  |
| PF3D7_0107700 | NA      | OST3/OST6, DDP glycosyltransferase, putative      |
| PF3D7_1313200 | MTFMT   | methionyl-tRNA formyltransferase, putative        |
| PF3D7_1200700 | ACS7    | acyl-CoA synthetase-7                             |
| PF3D7_0202200 | PTP1    | EMP1-trafficking protein                          |
| PF3D7_1370300 | MAHRP1  | membrane associated histidine-rich protein 1      |
| PF3D7_1001200 | ACBP2   | acyl-CoA binding protein, isoform 2, ACBP2        |
| PF3D7_0501400 | FIRA    | interspersed repeat antigen                       |
| PF3D7_0424700 | FIKK4.2 | serine/threonine protein kinase, FIKK family      |
| PF3D7_0731400 | FIKK7.2 | serine/threonine protein kinase, FIKK family      |
| PF3D7_1001100 | ACBP1   | acyl-CoA binding protein, isoform 1, ACBP1        |
| PF3D7_0215300 | ACS8    | acyl-CoA synthetase                               |
| PF3D7_0501100 | HSP40   | heat shock protein 40, type II                    |
| PF3D7_1477800 | ACBP    | acyl-CoA binding protein                          |
| PF3D7_1105600 | PTEX88  | translocon component PTEX88                       |
| PF3D7_0919300 | TrxL1   | thioredoxin-like protein 1, putative              |
| PF3D7_0831700 | HSP70-X | heat shock protein 70                             |
| PF3D7_1479000 | ACS1a   | acyl-CoA synthetase                               |
| PF3D7_0902500 | FIKK9.6 | serine/threonine protein kinase, FIKK family      |
| PF3D7_0104300 | UBP1    | ubiquitin carboxyl-terminal hydrolase 1, putative |
| PF3D7_0708500 | HSP86   | heat shock protein 86 family protein              |
| PF3D7_1102300 | NA      | Plasmodium exported protein, unknown function     |
| PF3D7_1341100 | NA      | U6 spliceosomal RNA                               |
| PF3D7_0308400 | NA      | U4 spliceosomal RNA                               |
| PF3D7_0922900 | FabG    | 3-oxoacyl-[acyl-carrier-protein] reductase        |
| PF3D7_0816500 | HSP20   | small heat shock protein HSP20, putative          |
| PF3D7_0731600 | ACS5    | acyl-CoA synthetase                               |
| PF3D7_0511200 | SCD     | stearoyl-CoA desaturase                           |
| PF3D7_1454100 | NA      | tRNA intron endonuclease, putative                |
| PF3D7_1248000 | NA      | tRNA-splicing endonuclease, putative              |
| PF3D7_0935100 | KSH1    | protein kish, putative                            |
| PF3D7_0901800 | NA      | Plasmodium exported protein                       |
| PF3D7_0221200 | NA      | Plasmodium exported protein (hyp15)               |
| PF3D7_1467300 | DXR     | 1-deoxy-D-xylulose 5-phosphate reductoisomerase   |

| Gene          | Symbol   | Description                                              |
|---------------|----------|----------------------------------------------------------|
| PF3D7_1148500 | NA       | non-coding RNA                                           |
| PF3D7_1215000 | Trx-Px2  | thioredoxin peroxidase 2                                 |
| PF3D7_1209200 | LSM7     | U6 snRNA-associated Sm-like protein LSM7                 |
| PF3D7_1344500 | USB1     | U6 snRNA phosphodiesterase, putative                     |
| PF3D7_0922900 | FabG     | 3-oxoacyl-[acyl-carrier-protein] reductase               |
| PF3D7_1209800 | ATP11    | ATP synthase mitoc. F1 complex assembly factor 1         |
| PF3D7_0802200 | 1-CysPxn | 1-cys peroxiredoxin                                      |
| PF3D7_1200700 | ACS7     | acyl-CoA synthetase                                      |
| PF3D7_0202200 | PTP1     | EMP1-trafficking protein                                 |
| PF3D7_0501400 | FIRA     | interspersed repeat antigen                              |
| PF3D7_0731600 | ACS5     | acyl-CoA synthetase                                      |
| PF3D7_0424700 | FIKK4.2  | serine/threonine protein kinase, FIKK family             |
| PF3D7_1337200 | DXS      | 1-deoxy-D-xylulose 5-phosphate synthase                  |
| PF3D7_1370300 | MAHRP1   | membrane associated histidine-rich protein 1             |
| PF3D7_1479000 | ACS1a    | acyl-CoA synthetase                                      |
| PF3D7_0308400 | NA       | U4 spliceosomal RNA                                      |
| PF3D7_0907700 | PA28     | proteasome activator 28                                  |
| PF3D7_0831700 | HSP70-X  | heat shock protein 70                                    |
| PF3D7_0902500 | FIKK9.6  | serine/threonine protein kinase, FIKK family             |
| PF3D7_1001100 | ACBP1    | acyl-CoA binding protein, isoform 1, ACBP1               |
| PF3D7_0215300 | ACS8     | acyl-CoA synthetase                                      |
| PF3D7_0731400 | FIKK7.2  | serine/threonine protein kinase, FIKK family, pseudogene |
| PF3D7_0104300 | UBP1     | ubiquitin carboxyl-terminal hydrolase 1, putative        |
| PF3D7_1001200 | ACBP2    | acyl-CoA binding protein, isoform 2, ACBP2               |
| PF3D7_1454100 | NA       | tRNA intron endonuclease, putative                       |
| PF3D7_1248000 | NA       | tRNA-splicing endonuclease, putative                     |
| PF3D7_0935100 | KSH1     | protein kish, putative                                   |
| PF3D7_0901800 | NA       | Plasmodium exported protein, unknown function            |
| PF3D7_0221200 | NA       | Plasmodium exported protein (hyp15), unknown function    |
| PF3D7_0919300 | TrxL1    | thioredoxin-like protein 1, putative                     |
| PF3D7_1105100 | H2B      | histone H2B                                              |
| PF3D7_1203900 | UBC      | ubiquitin-conjugating enzyme E2                          |
| PF3D7_0314100 | NA       | vesicle transport v-SNARE protein, putative              |
| PF3D7_1243600 | NA       | translation initiation factor SUI1, putative             |
| PF3D7_1030000 | SPT4     | transcription elongation factor SPT4, putative           |
| PF3D7_0617900 | H3.3     | histone H3 variant                                       |
| PF3D7_0501100 | HSP40    | heat shock protein 40, type II                           |
| PF3D7_1116800 | HSP101   | heat shock protein 101                                   |
| PF3D7_1436300 | PTEX150  | translocon component PTEX150                             |
| PF3D7_1477800 | ACBP     | acyl-CoA binding protein                                 |
| PF3D7_0104200 | NA       | StAR-related lipid transfer protein                      |
| PF3D7_1203800 | NA       | non-coding RNA                                           |
| PF3D7_1345100 | TRX2     | thioredoxin 2                                            |
| PF3D7_1121600 | EXP1     | exported protein 1                                       |
| PF3D7_0816500 | HSP20    | small heat shock protein HSP20, putative                 |
| PF3D7_1471100 | EXP2     | exported protein 2                                       |

- Up in both (NF54 and *pB104*)
- Up only in NF54
- Up only in *pB104*
- Up *pB104* down NF54
- Down in both (NF54 and *pB104*)
- Down only in *pB104*
- Down only in NF54
- Down *pB104* up NF54

**Figure S6.** DHA and BTZ differential expression genes from RNAseq analysis (see Method) comparison between *piggybac* sensitive mutant, *pB104*, and NF54 wild-type. The entire list of differentially expressed genes is provided in DataSet S4 and S5.

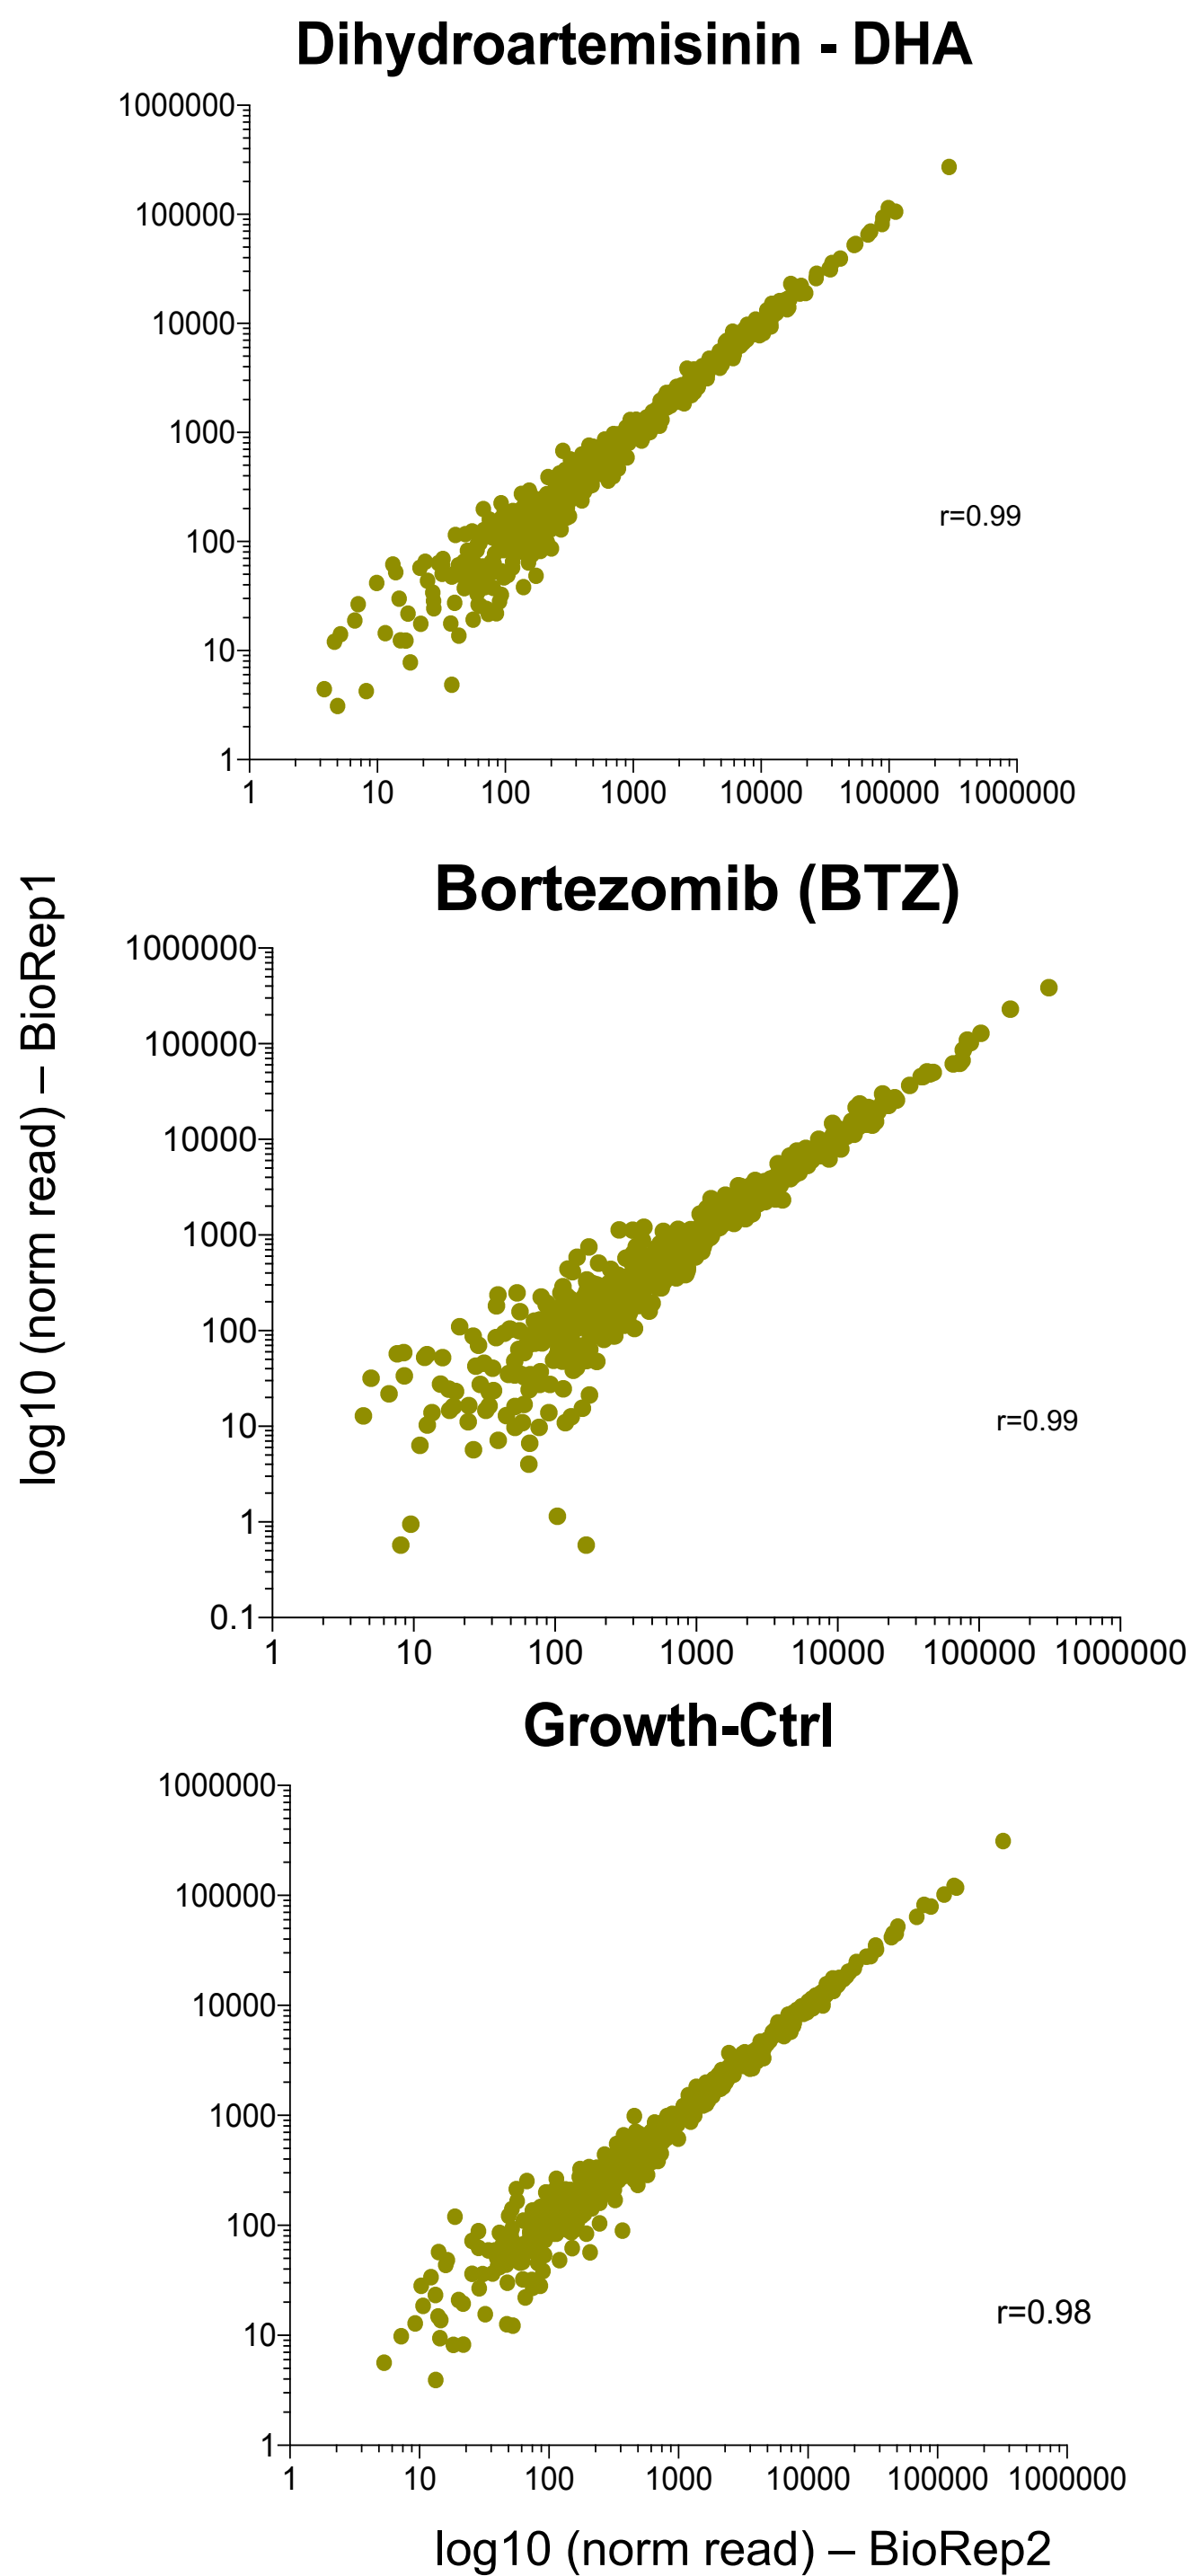

**Figure S7.** Person correlation between biological replicates of each drug (DHA and BTZ) screens and no-drug growth-control

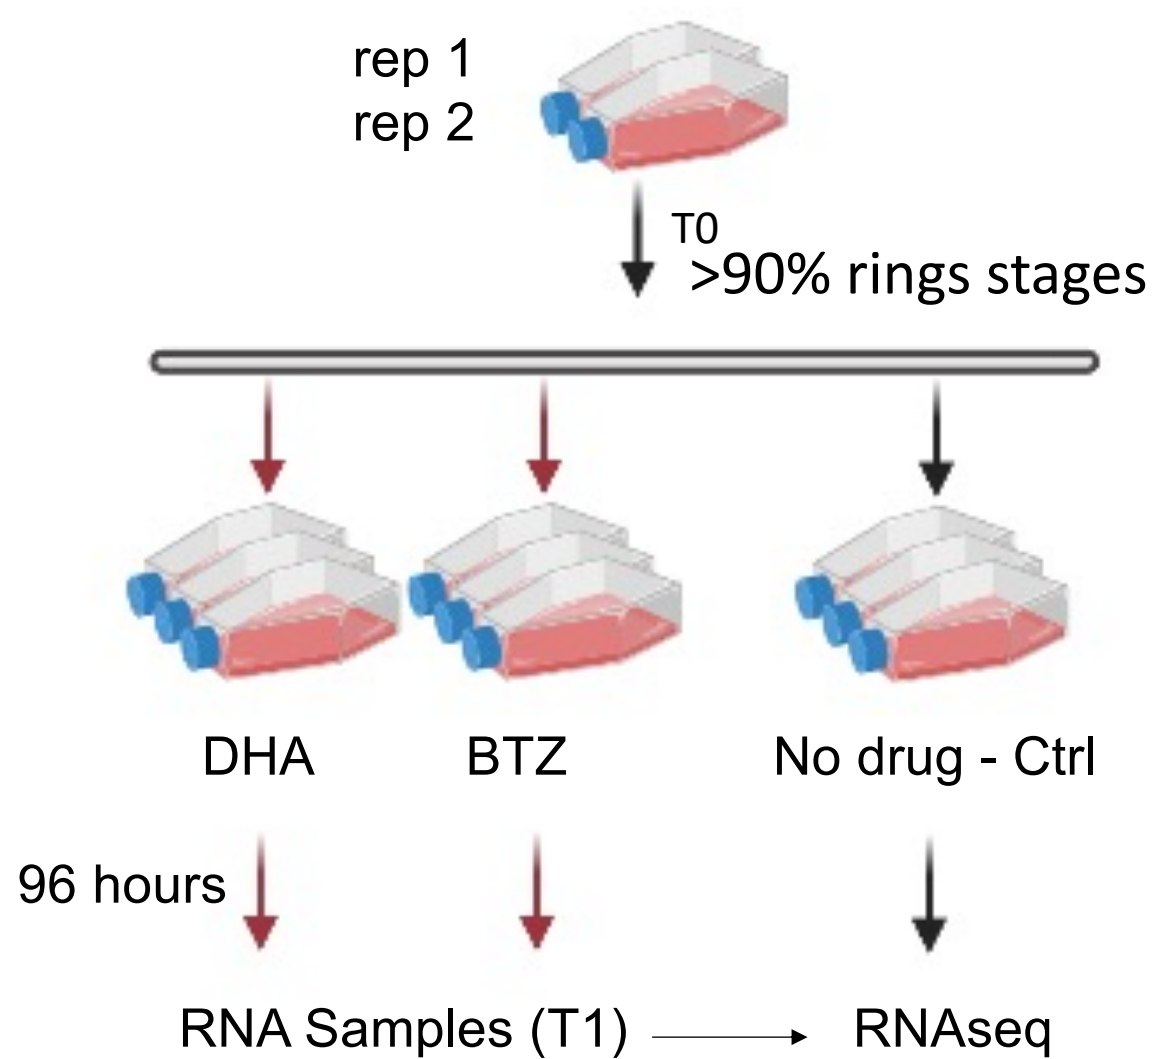

**Figure S8.** The experiment approach of RNAseq. Two biological replicates were performed. Cultures of wildtype NF54 and sensitive mutant *pB104* were synchronized to rings, the timepoint zero (T0) were harvested, then split equally into experimental flasks (DHA and BTZ) and Control flasks (no-drug growth control). All parasites were grown at the normal culture condition. Experimental flasks of each parasite-line were then exposed to 96 hours of continuous drug-pressure at sublethal dose (4 nM) of DHA and BTZ (40 nM). Control-flasks were cultured continuously in parallel at 37°C without drug. After the 96 hours the RNA was harvested simultaneously from all conditions for RNAseq. Parasitemia was verified by Giemsa smear at every day. RNAseq was performed on an Illumina NextSeq V2.5 mid-output 300-cycle, Truseq reagent kit (see Methods).



# Normalized reads (DEseq2) correlation

# Figure S9

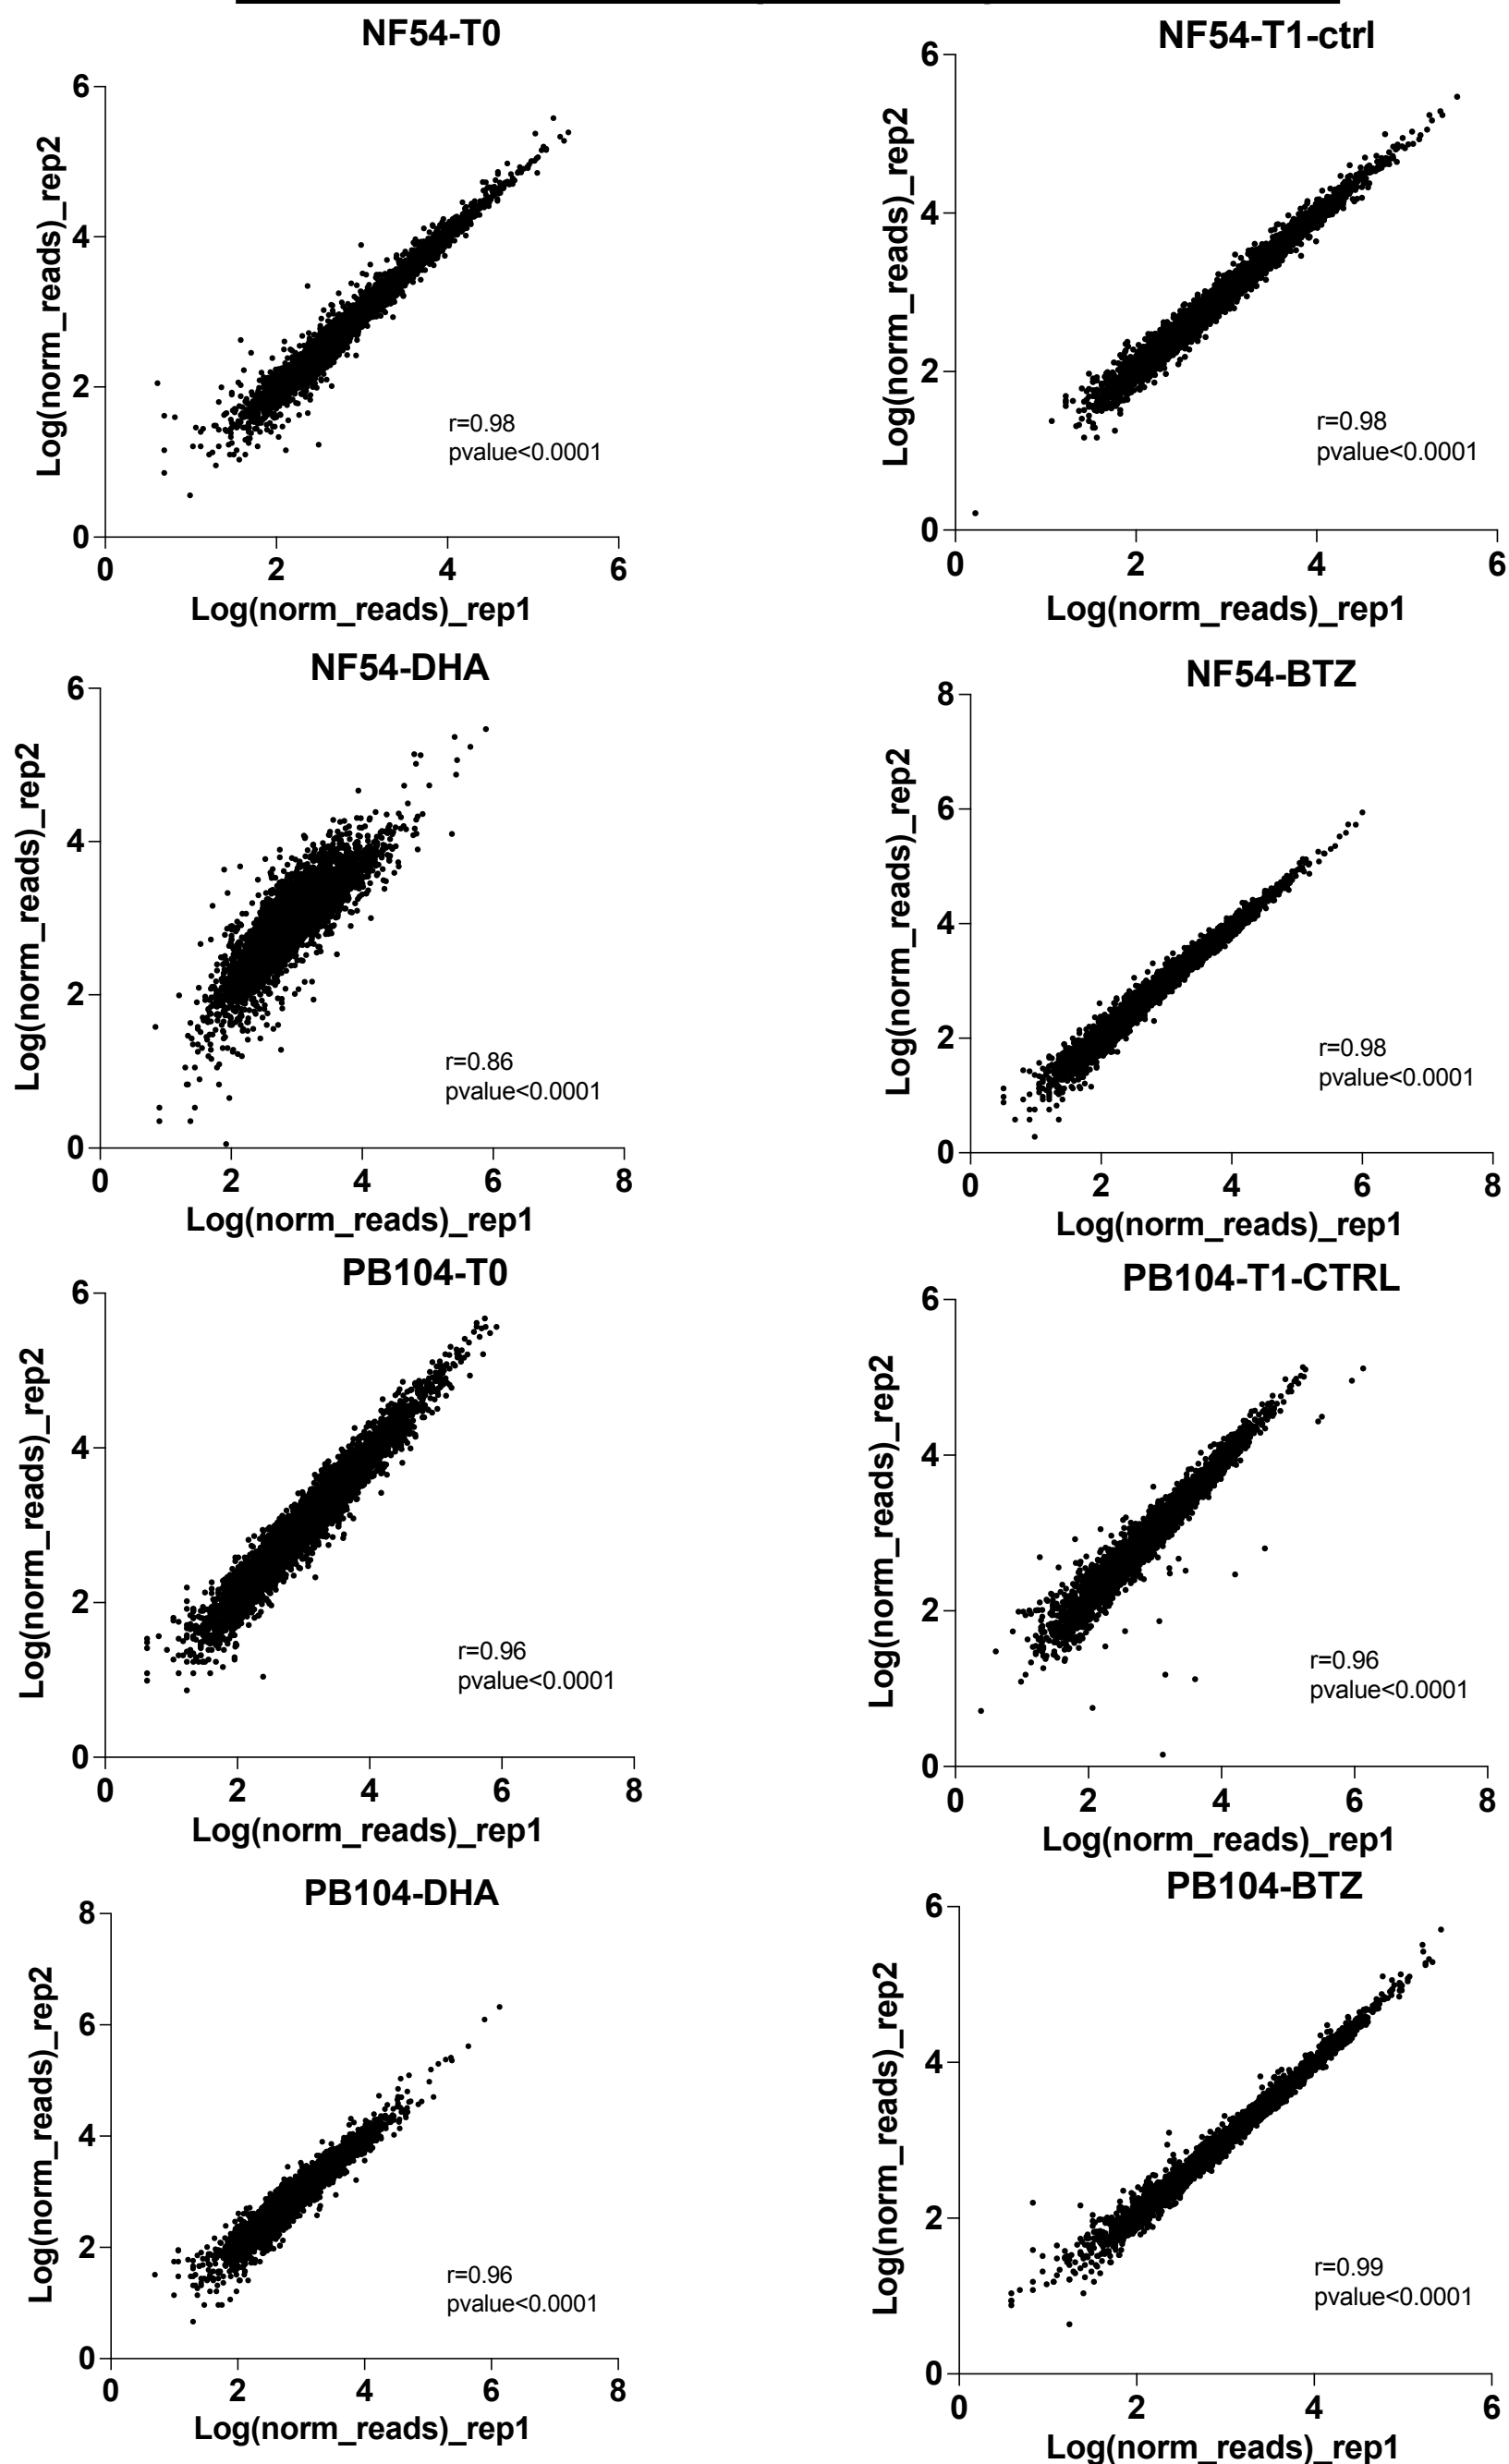

**Figure S9.** Pearson correlation between biological replicates of RNAseq data of NF54 no-drug controls in two time points (NF54\_T0, NF54\_T1\_control), and treated with DHA (NF54\_DHA) and BTZ (NF54\_BTZ), *pB104* no-drug controls in two time points (*pB104\_T0*, *pB104\_T1\_control*), and treated with DHA (*pB104\_DHA*) and BTZ (*pB104\_BTZ*). The correlation analysis was performed to DEseq2 normalized reads.
