# Supplementary material for: Chemogenomic Profiling of a Plasmodium falciparum Transposon Mutant Library Reveals Shared Effects of Dihydroartemisinin and Bortezomib on Lipid Metabolism and Exported Proteins
Source: PubMed Central journal article supplement (PMC10269874; doi:10.1128/spectrum.05014-22), 2023-04-17
Supplement: spectrum.05014-22-s0002.pdf [file spectrum.05014-22-s0002.pdf]

## **Guide to Supplementary Data**

### **DataSet S1: QIseq data info**

Tab1: Raw QIseq data sets generated for this study were deposited to the European Nucleotide Archive under study accession code ERP114305

Tab 2: Original reads mapping generated by QIseq

### **DataSet S2: Half k screens DEseq outputs**

Tab1: DHA\_treated

Tab2: BTZ\_treated

Tab 3: No-Drug\_Ctrl\_treated

### **DataSet S3: MPMP enrichment**

Tab1: Tolerants (DHA and BTZ)

Tab2: Sensitives (DHA and BTZ)

### **DataSet S4: NF54 RNAseq analysis, DEseq2 out**

Tab 1: No-Drug\_Ctrl\_treated

Tab 2: DHA\_treated

Tab 3: BTZ\_treated

### **DataSet S5: pB104 RNAseq analysis, DEseq2 out**

Tab 1: No-Drug\_Ctrl\_treated

Tab 2: DHA\_treated

Tab 3: BTZ\_treated

### **DataSet S6: GO enrichment**

Tab 1: merged DHA\_BTZ

Tab 2: DHA categories

Tab 3: BTZ categories

**Table S1: GO enrichment of half K library; data referred to Figure 1B**

**Table S2: GO enrichment DHA and BTZ phenotype (sensitive and tolerant); data referred to Figure 2B**
